# Supplementary material for: A covalently linked phenanthridine–ruthenium(ii) complex as a RNA probe
Source: Royal Society of Chemistry journal article supplement (doi:10.1039/b900290a), 2009-01-01

## Fluorescence investigation of a covalently linked phenanthridine-ruthenium(II) complex and its application as an RNA probe

Naphtali A. O'Connor,<sup>a</sup> Nathan Stevens,<sup>b</sup> Diana Samaroo,<sup>c</sup> Marissa R. Solomon,<sup>b</sup> Angel A. Martí,<sup>d</sup> Joanne Dyer,<sup>b</sup> Harshad Vishwasrao,<sup>e</sup> Daniel L. Akins,<sup>f</sup> Eric R. Kandel<sup>e</sup> and Nicholas J. Turro<sup>\*b</sup>

*a* Department of Chemistry, Lehman College of The City University of New York, Bronx, NY 10468, United States. E-mail: [naphtali.oconnor@lehman.cuny.edu](mailto:naphtali.oconnor@lehman.cuny.edu)

*b* Department of Chemistry, Columbia University, 3000 Broadway, New York, NY 10027, United States. E-mail: [njt3@columbia.edu](mailto:njt3@columbia.edu)

*c* Department of Neurology and Neuroscience, Weill Cornell Medical College, New York, NY 10065, United States.

*d* Department of Chemistry, Rice University, Houston, Texas 77005, United States.

*e* HHMI, Columbia University College of Physicians and Surgeons, New York, NY 10032, United States.

*f* Department of Chemistry, City College of The City University of New York, New York, NY 10031, United States.

### Experimental procedure

#### Steady-state and time-resolved luminescence measurements

Steady-state luminescence spectra were performed on a FL3-22 Fluorolog-3 spectrometer (J. Y. Horiba, Edison, NJ, USA). In a typical experiment, the spectra were obtained in solutions of 2.0  $\mu\text{M}$  RuEth or 2.0  $\mu\text{M}$  RuITC, with or without 0.25mg/ml Turolla Yeast RNA (Aldrich) in solutions of 10 mM Tris-HCl, 400 mM NaCl, 5mM MgCl<sub>2</sub> pH 7.5. An excitation wavelength of 450 nm was used. The quantum yield was determined using Ru(phen)<sub>3</sub>Cl<sub>2</sub> ( $\phi_{\text{F}} = 0.058$ ) as the standard.

Time-resolved experiments were performed on either an OB920 single-photon counting spectrometer (Edinburgh Analytical Instruments) with a Picoquant 460 nm pulsed LED as excitation source or a streak camera system described in detail elsewhere.<sup>1</sup> Exponential fits were obtained with the programs included with the instruments.

#### Cell culture

MDA-MB-231 cells were grown in Dulbecco's modified eagle medium (DMEM) supplemented with 10% bovine calf serum, and 1% antimycotic. Cells were maintained at 37 °C in an atmosphere of 5% CO<sub>2</sub>. For experiments, cells were seeded onto coverslips and left to adhere overnight prior to fluorescence assays.

### Fluorescence imaging

Cells were plated onto coverslips in cell culture dishes and allowed to grow overnight. RuEth (2 mM dissolved in 1:1 DMF/water mixture) was added to culture media to a final concentration of 10  $\mu$ M. After 24 h incubation, cells were then washed twice with 1X phosphate buffered saline (PBS) solution prior to fixation. Cells were fixed by incubation with 4% paraformaldehyde in PBS at room temperature for 20 min. Once fixed, cells were washed further in 1X PBS 4-5 times. Samples were mounted with Dako fluorescent mounting medium, put onto glass slides, air dried, and then visualized using an Olympus Fluoview FV1000 laser scanning confocal microscope. Images were acquired through a 60X 1.4 NA oil objective using 454 nm excitation and a variable bandpass emission filter set to 560-685 nm.

### Synthesis

#### Materials and Instrumentation

All reactions were run under an atmosphere of dry nitrogen. Anhydrous solvents were transferred by oven-dried syringe needles purged with dry nitrogen. Flasks were flame dried *in vacuo*, or oven dried at 160 °C for greater than 2 hours. Dimethylformamide (DMF) was dried over activated 4Å sieves and placed under vacuum (0.01 – 0.02 torr) to remove low boiling amines and carbon monoxide. All solvents were purchased from the Sigma-Aldrich Company and used without further purification. NMR was performed on a Bruker 500 MHz instrument and the FT-IR on a Nicolet 8700 spectrometer.

**3,8-diamino-5-(5-ammoniopentyl)-6-phenylphenanthridinium bromide (hydrobromide salt) (1).** This was prepared according to the method described by Meunier.<sup>2</sup>

**RuEth.** To a solution of phenanthridinium **1** (50 mg, 0.094 mmol) in DMF (5 mL) was added Ruthenium isothiocyanate **RuITC** (75 mg, 0.094 mmol) and triethyl amine (100 mg, 0.94 mmol). The mixture was stirred overnight and precipitated by the addition of Et<sub>2</sub>O. This precipitate was washed with water, ethanol and acetone to provide a red powder. This powder was purified by column chromatography on reverse phase C-18 silica gel with an eluent of 20% methanol in chloroform. This provided 30 mg of a red powder (24% yield):  $\delta_{\text{H}}$  (500 MHz, CD<sub>3</sub>OD) 9.04 (d, *J*8.3, 1 H), 8.75 (m, 2 H), 8.72 (d, *J*8.1, 2 H), 8.62, (m, 1 H), 8.56 (m, 1 H), 8.49 (d, *J*8.4, 1 H), 8.23 (d, *J*5.2, 1 H), 8.19 (m, 2 H), 8.15 (d, *J*5.3, 1 H), 8.09 (m, 2 H), 8.05 (d, *J*5.2, 1 H), 8.02 (d, *J*5.2, 1 H), 7.95 (m, 2 H), 7.88 (dd, *J*8.6 5.2, 1 H), 7.84-7.72 (m, 6 H), 7.66 (m, 3 H), 7.57 (m, 2 H), 7.49 (s, 1 H), 7.42 (s, 1 H), 7.36 (m, 2 H), 3.57 (m, 2 H), 2.08 (m, 2 H), 1.68 (m, 2 H), 1.55 (m, 2 H), 1.48 (m, 2 H);  $\nu_{\text{max}}$ (CaF)/cm<sup>-1</sup> 3300, 3180, 3050, 2920, 2850, 1620, 1540, 1425; HRMS (FAB+) *m/z* calcd for C<sub>57</sub>H<sub>50</sub>F<sub>6</sub>N<sub>11</sub>PRuS<sup>+</sup>(M<sup>+</sup>) 1167.27, found 1167.30.

### References

1. Stevens, N. Ph.D. thesis, The City University of New York, New York, NY, **2006**.
2. Ross, S. A.; Pitie, M.; Meunier, B. *J. Chem. Soc. Perkins Trans. 1* **2000**, 571-574.

# RuEth

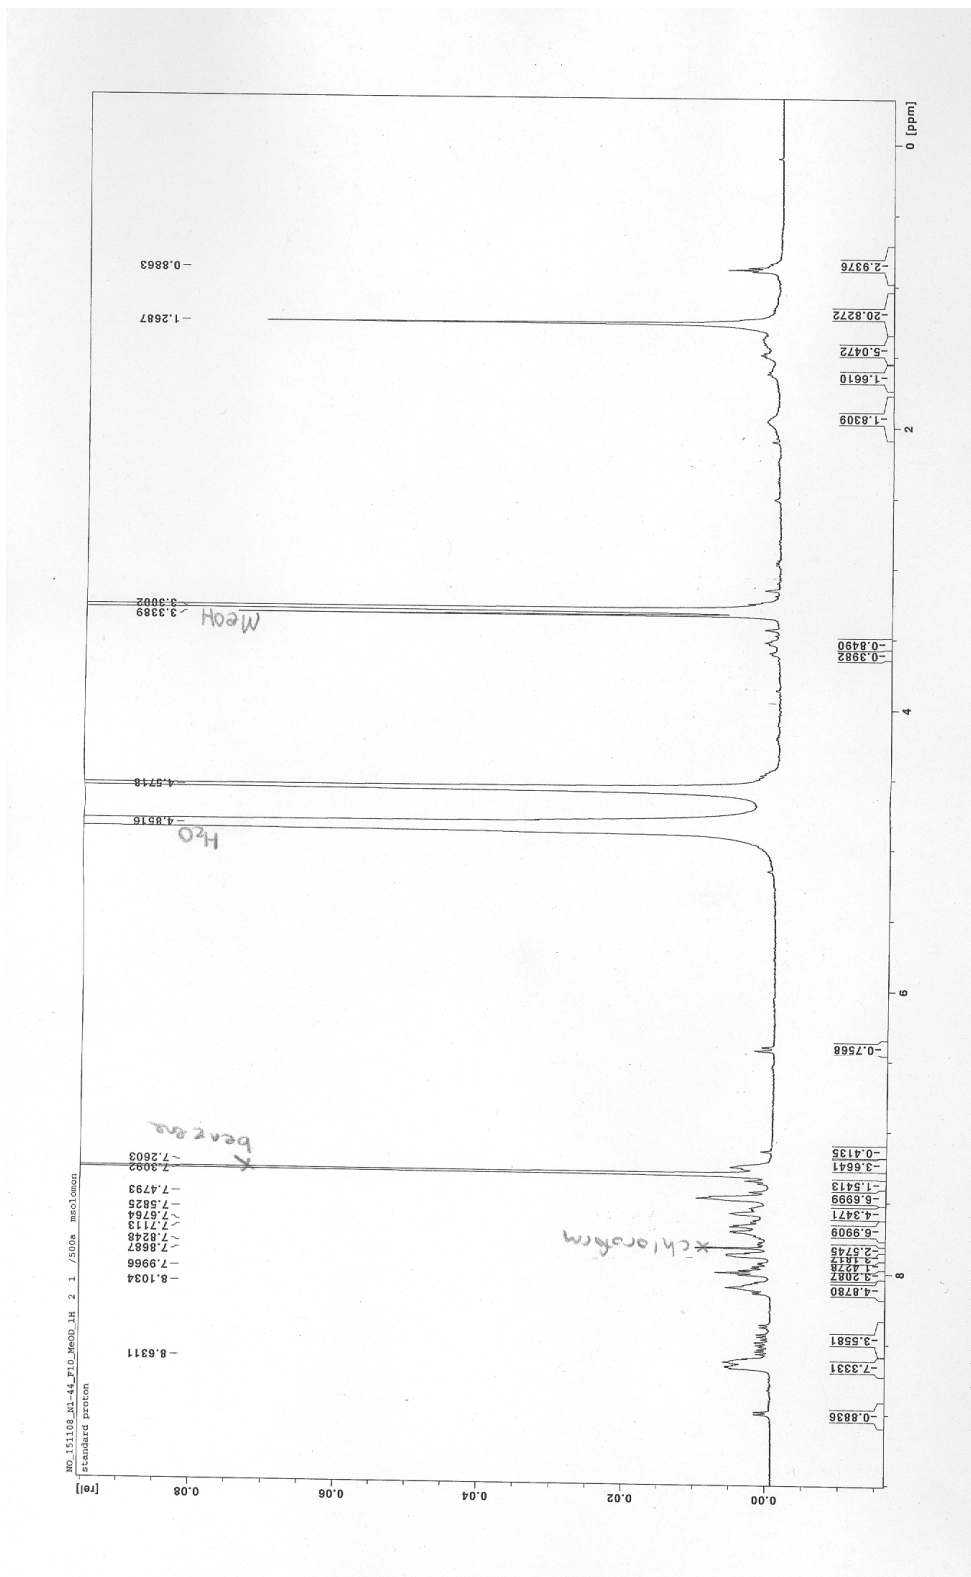

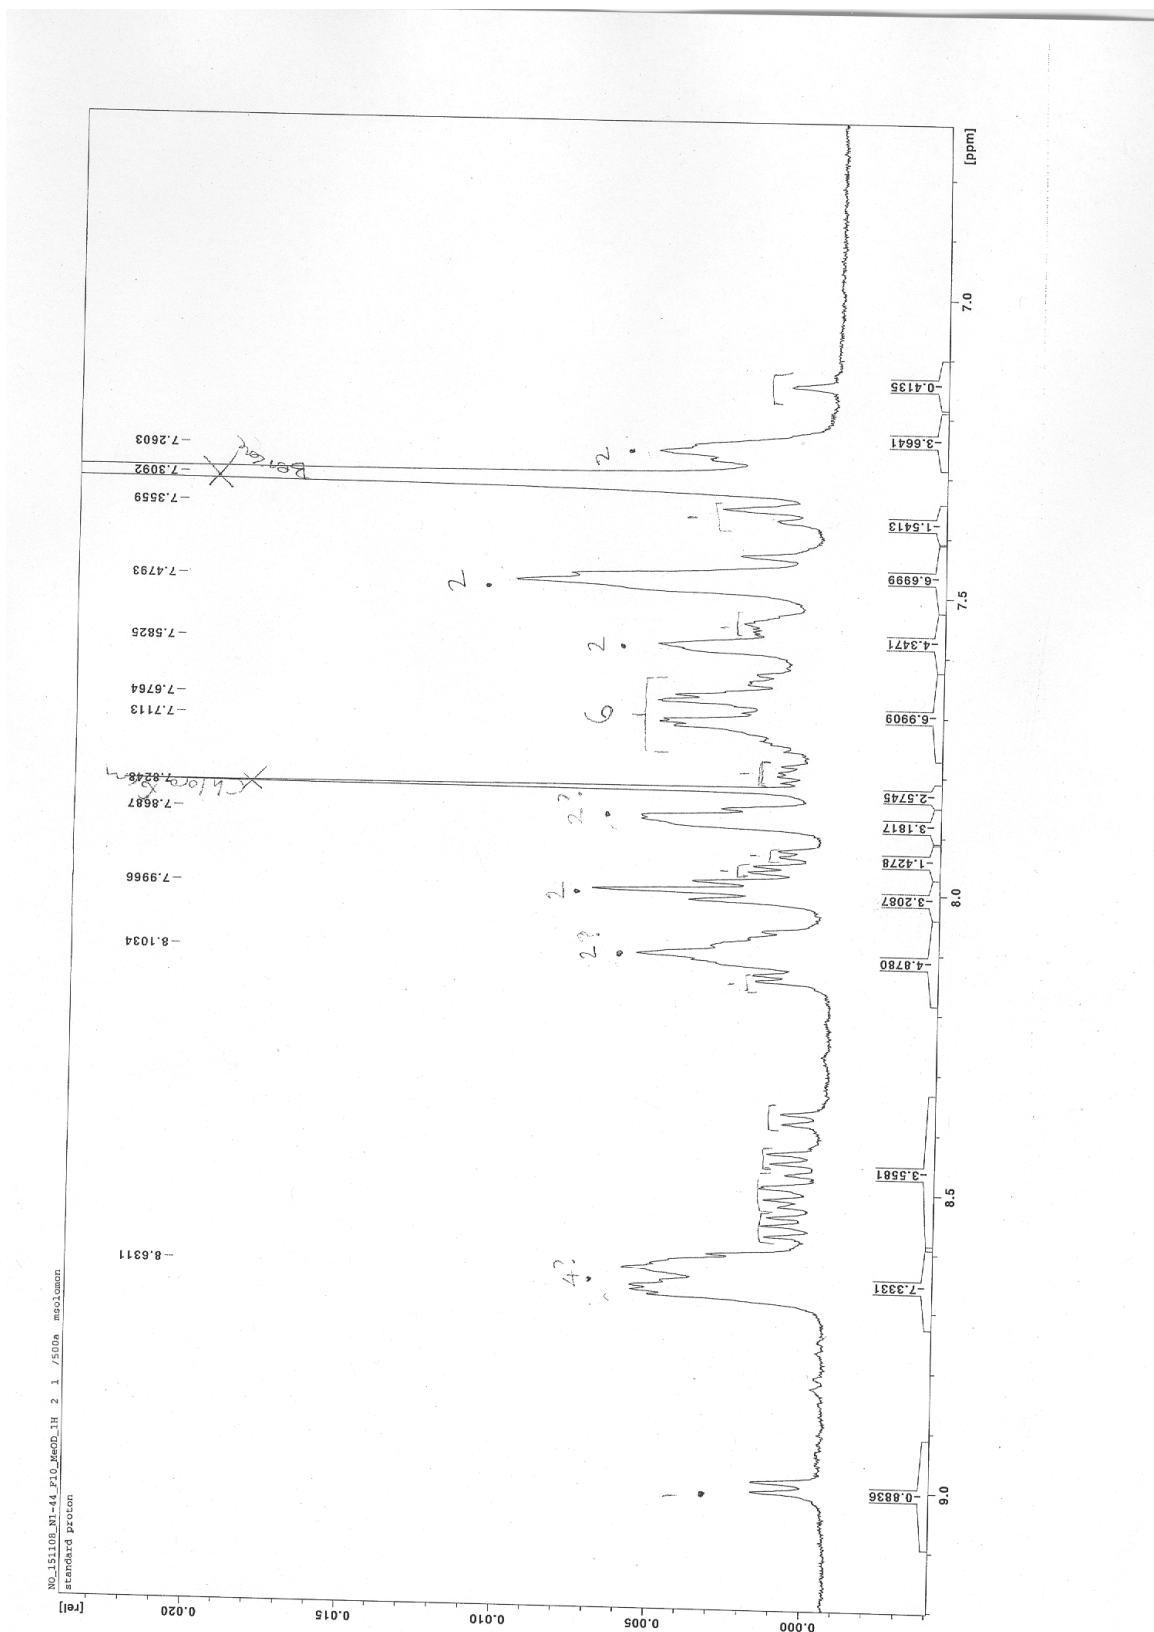

Supplement: b900290a.pdf [file b900290a.pdf]
